# Supplementary material for: Telecoupling Cannot Be Ignored for the Forest-Based Carbon Market
Source: Preprints.org preprint supplement (doi:10.20944/preprints202404.1765.v1), 2024-04-26
Supplement: Supplementary file 2 [file supplementary]

## Sheet: Description
Table. S1. Assessment of 100 registered forest-based VERA projects. We used Verra’s public registry https://registry.verra.org/app/search/VCS/All%20Projects to obtain a sample of carbon offsets for forest-based projects (codes VM0003, VM0004, VM0005, VM0006, VM0007, VM0009, VM0010, VM0011, VM0012, VM0015, VM0034, VM0035, VM0037, VM0045 https://verra.org/methodologies-main/). Using a random sample…

## Sheet: Sheet1
ID	Name	Proponent	Project Type	AFOLU Activities	Methodology	Status	Country Area	Estimated Annual Emission Reductions	Region	Region - Notes	Project Registration Date	Crediting Period Start Date	Crediting Period End Date	Complete	Obscurity associated with complex supply chains	Lack of standardised reporting (was/will a standardised reporting framework be utilised?)	Lack of standardised reporting (was/will a standardised reporting framework be utilised?)"- Notes	Verification and monitoring challenges (have challenges been made explicit?)	Additionality and global persistence of forests (leakage effect)	Additionality and global persistence of forests (leakage effect) - Notes	Loss of old growth forests	Loss of old growth forests - Notes	Broader ecosystem resilience to climate change	Broader ecosystem resilience to climate change - Notes	Participation of local people	Participation of local people - Notes	Land grabbing and displacement of local people	Land grabbing and displacement of local people - Notes	Unequal distribution of benefits and costs	Unequal distribution of benefits and costs - Notes	Biodiversity	Biodiversity - Notes	Restoring marginal lands		Other ecosystem services	Other ecosystem services - Notes	Local persistence and/or additionality of project	Local persistence and/or additionality of project - Notes	Cost (is the project for profit?)	Carbon	Public comments	Notes
2975	U' Balam'moo A'kalché ó Blue Carbon Mangrove Conservation Project, Conserving Coastal Ecosystems in Campeche to Support Life	BlueMX Mangrove A.C.	Agriculture Forestry and Other Land Use	REDD; WRC	VM0007	Under development	Mexico	667276	North America			14/06/2016	13/06/2056	1									1		1				1		1		1				1		1	1	Due to the knowledge of the area of the Yucatan peninsula, and the inhabitants of the area, who are unaware of the procedures and the environmental benefits that their lands can generate, they become victims of opportunistic non-Mexican people who get rich if they leave benefits to the towns. so I leave this comment to the VERRA community for consideration.	Public comment implies unequal distribution of benefits.
1561	Sustainable Forestry Management Plan Capture and Sequestration Carbon	Global Servicos de Engenharia	Agriculture Forestry and Other Land Use	REDD	VM0007; AR-ACM0003	Under development	Brazil	99696	Latin America			2016-05-05	2046-04-05	1				1		Leakage is mentioned, but the description of how it is considered doesn't really seem to address leakage: The leakage does not occur when we handle trees that have died, for example, 1 hectare, there are for example 8 to 12 dead trees, that is, no longer meet the carbon cycle. Sustainable management, we anticipate the removal of no more than 5 trees for minimal impact on fauna and avifauna, so th…		ENCOURAGED BY THIS PROJECT															1		1	1		"Our focus with this team is carefully determine the trees that have done carbon cycle, i.e. those which already has more than 125 years and can no longer capture and not kidnap carbon from the atmosphere." Therefore the loss of old growth forest is actively encouraged by this project.
3125	Shaanxi Foping Improved Forest Management Project	China Carbon Sinks Holdings Limited	Agriculture Forestry and Other Land Use	IFM	VM0010	Registration requested	China	41521	Asia			28/12/2017	27/12/2047	1										The project is said to "contributes to local climate change mitigation and adaptation" but all it says on the issue is "benefit the local environmental condition by producing more oxygen and absorb more greenhouse gas". Therefore I'm not counting it.											1		1		1	1
1390	Carmen del Darien (CDD) REDD+ Project	Multiple Proponents	Agriculture Forestry and Other Land Use	REDD	VM0006	Registered	Colombia	462190	Latin America		2020-06-04	28/01/2014	27/01/2044	1		1		1	1		1				1				1		1		1		1		1		1	1		This seems like a very comphrehensive project likely to yeild benefits.
3179	Conservation and restoration of the tropical dry forest of the north coast of Peru	AIDER	Agriculture Forestry and Other Land Use	REDD	VM0006	Registration requested	Peru	561213	Latin America			2021-01-07	30/06/2041	1						ENCOURAGED BY THIS PROJECT, "In the present project, degradation involves the extraction of wood for commercial markets. For this reason, the aim is to reduce the levels of wood extraction with the activities of the Project, which entails the transfer of production to other areas to compensate for the reduction. "				It is mentioned, but there is no evidence provided as to how this will be achieved, "The evaluation periods for the counting of GHG emissions, capacity for climate adaptation and resilience, community and/or biodiversity will not vary, will be evaluated simultaneously. As mentioned, the monitoring reports will be prepared every 2 to 3 years, depending on the project conditions. "		No plan for their engagment provided, it does say, "Identified stakeholders have access to REDD+ project description documents. AIDER has an office in the city of Piura and technical staff both in Piura and Tumbes, to whom both the SERNANP team and the populations settled in areas surrounding the project can consult and request information related to the project. Likewise, during the verification…				Equitable distribution of benefits is mentioned, but no plan about how this will be achieved is detailed (see pg. 230)	1		1			Other ecosystem services are mentioned, but there are no details about what these are.	1		1	1
1395	Bajo Calima y Bahía Málaga (BCBM) REDD+ Project	Multiple Proponents	Agriculture Forestry and Other Land Use	REDD	VM0006	Registered	Colombia	498719	Latin America		2020-06-04	26/08/2013	25/08/2043	1		1				Leakage did occur because of this project, see pg. 135	1			The project is not seeking gold level climate benefits at this time.					1		1		1		1			Additionality is mentioned, but there are no details about it	1	1
4078	Acadian Forest Carbon Project	Multiple Proponents	Agriculture Forestry and Other Land Use	IFM	VM0034	Under validation	Canada	23820	North America			2021-01-04	31/03/2051	1					1			Based on their harvesting schedule, the document says "This is a ‘coarse filter’ ecosystem management strategy that is expected to accelerate the restoration of old growth ecosystem characteristics of a natural Acadian Forest." But it seems they are talking about old growth as if it were just a few years old rather than intact, extant native forest.		It does say, "Although not directly monitored at the project start, the Acadian project also expects to generate significant co-benefits for biodiversity, water quality, forest health and climate resilience; and the project may improve the visual aesthetics of forests in the area and potentially generate improved recreational and other amenity value for local communities." but does not indicate h…		The project deems this not relevant in their case						No details provided about how this will be achieved	1				1		1	1
3811	Chirisa REDD+ Project	Carbon Green Investments Guernsey Limited	Agriculture Forestry and Other Land Use	REDD	VM0009	Under validation	Zimbabwe	476031	Africa			2021-06-05	2051-05-05	1																									1	1	This is a scam	Not many details at all provided about this project
4110	Henan Luoning IFM (conversion of logged to protected forest) Project	Zhejiang Zhongzheng Forestry Development Co.,Ltd	Agriculture Forestry and Other Land Use	IFM	VM0010	Under validation	China	137285	Asia			2020-01-04	31/03/2050	1						There is the possiblity of market leakage						It just says that documents will be made publically available for local people, it doesn't look like they are actually involved in any planning or implementation activities					1		1				1		1	1
2403	Riau Ecosystem Restoration Carbon Project	Multiple Proponents	Agriculture Forestry and Other Land Use	REDD; WRC	VM0007	On Hold	Indonesia	6870411	Asia		20/10/2021	17/06/2016	16/06/2073	1	1	1		1	1		1				1						1		1		1		1		1	1
1953	Floresta Verde REDD+ Project	Floresta Verde ServiÃ§os Ltda.	Agriculture Forestry and Other Land Use	REDD	VM0015	Registered	Brazil	340000	Latin America		28/09/2020	2016-01-01	31/12/2045	1						Leakage did occur						Documents have been made available to the public, but thats it		This did occur, see page 74.			1		1						1	1	https://registry.verra.org/mymodule/ProjectDoc/Project_ViewFile.asp?FileID=72004&IDKEY=oiquwesdfmnk0iei23nnm435oiojnc909dsflk9809adlkmlkf599293516
4042	Cauaxi REDD+ Grouped Project	BRCARBON SERVIÃ‡OS AMBIENTAIS LTDA	Agriculture Forestry and Other Land Use	REDD	VM0015	Under validation	Brazil	529289	Latin America			2022-02-05	2122-01-05	1						Leakage did occur					1			This did occur, see page 32			1		1						1	1	https://registry.verra.org/mymodule/ProjectDoc/Project_ViewFile.asp?FileID=88327&IDKEY=clksjoiuwqowrnoiuomnckjashoufifmln902309ksdflku098i121802933	Public comments are extensive and negative
3170	Fujian longyan IFM (conversion of logged to protected forest) Project	Hangzhou Chaoteng Energy Technology Co., Ltd	Agriculture Forestry and Other Land Use	IFM	VM0010	Registration requested	China	46640	Asia			2018-01-01	31/12/2047	1						There is the possiblity of market leakage			1		1						1						1		1	1
3296	Developing Carbon Finance Project for Van Panchayats in Soil Conservation Forest Division Nainital (Uttarakhand)	Multiple Proponents	Agriculture Forestry and Other Land Use	REDD	VM0037	Under development	India	22573	Asia			15/12/2018	14/12/2038	1											1						1		1			Other ecosystem services are mentioned, but there are no details about what these are.	1		1	1
1201	Gola REDD project	Gola Rainforest Conservation LG	Agriculture Forestry and Other Land Use	REDD	VM0007	Registered	Sierra Leone	498667	Africa		2015-11-04	2012-01-08	31/07/2042	1						Leakage expected to occur			1		1				1		1				1		1			1
3147	Jiangxi Suichuan Improved Forest Management Project	Jiangxi Tianye Biotechnology Limited	Agriculture Forestry and Other Land Use	IFM	VM0010	Registration requested	China	52637	Asia			2018-01-03	29/02/2048	1										It does say "thus contributes to local climate change mitigation and adaptation" but its not clear how this will be achieved			NA	This forestry stand is old, so maybe not relevant							1		1	"will take relevant protection measures, mainly focusing on forest resource supervision and monitoring. In order to supervise and monitor any disturbances that may affect the whole forest, a ranger team has been established to monitor the state of the forest with regard to diseases, illegal logging, hunting, fires etc. "	1	1
1935	Hubei Hongshan IFM (Conversion of Logged to Protected Forest) Project	Zhejiang Zhongzheng Forestry Development Co.,Ltd	Agriculture Forestry and Other Land Use	IFM	VM0010	Registered	China	292309	Asia		2020-04-06	2015-01-01	31/12/2044	1						It said that it would be monitored, and not actions were outlined for if it did occur					1						1		1						1	1
2518	Carbon sequestration in mangroves of the south â€“ central coastal zone of the state of Sinaloa, MÃ©xico	ALLCOT AG	Agriculture Forestry and Other Land Use	REDD	VM0007	Under development	Mexico	3123836	Latin America			2021-01-06	31/05/2051	1		1	https://verra.org/methodologies/vm0007-redd-methodology-framework-redd-mf-v1-6/						1									Only in the context of a law (Article 4 of the Political Constitution of the United Mexican States)	1				1			1
852	Rio Bravo Climate Action Project	Programme for Belize	Agriculture Forestry and Other Land Use	REDD	VM0007	Registered	Belize	94970	North America		2020-06-04			1				1	1	No baseline deforestation took place during this reporting period, therefore no market effects leakage or activity shifting leakage would have taken place during this period and are accounted as 0 (zero). AENOR verified that this circumstance was properly considered, according to previous MR, VM0007, VMDO011 and VCS rules.	1				1						1						1		1	1
3812	Painted Forest Carbon Project	Perimeter Forest Limited Partnership	Agriculture Forestry and Other Land Use	IFM	VM0012	Under validation	Canada	266624	North America			2021-02-09	2121-01-09	1	1		Only in the context of compliance - but can't see a specific reporting framework used	1		It is considered, but only at the local scale	1		1		1		NA				1				1				1	1	All positive
1911	King County Rural Forest Carbon Project	King County Department of Natural Resources, Water and Land Division	Agriculture Forestry and Other Land Use	IFM	VM0012	Registered	United States	9195	North America		29/09/2020	2015-01-01	31/12/2114	1				1		Yes, but only in the State of Washington	1				1		NA					Mentioned, but no details provided "By retaining and protecting existing forest and managing for ecological function and enhancement this carbon project will protect or enhance aspects of biodiversity, water quality and quantity, and other ecosystem services."	1			They are mentioned, but its not really clear what these are.	1		1	1		None provided
3456	Fujian Datian Improved Forest Management Project	Multiple Proponents	Agriculture Forestry and Other Land Use	IFM	VM0010	Registration requested	China	135193	Asia			31/01/2020	30/01/2050	1				1		Only at the local scale				It is mentioned, "After the implementation of the project, the increasing forest coverage rate will benefit the local environmental condition by producing more oxygen and absorb more greenhouse gas, thus contributes to local climate change mitigation and adaptation." But there aren't details of how this will be achieved.		There was a survey conducted, but raw responses are not provided, only a summary organised by the implementer. I don't think this is enough to qualify as participation of local people.					1						1		1	1		Raw responses not provided, therefore, summary provided by implementor is not objective
1399	MutatÃ¡ REDD+ Project	Cabildo Mayor IndÃ­gena de MutatÃ¡	Agriculture Forestry and Other Land Use	REDD	VM0006	Registered	Colombia	156476	Latin America		2020-06-04	26/06/2013	25/06/2043	1		1	VCS Version 3 and the VM0006 v2.1 methodology and associated tools, as well as the CCB Standards 3rd Edition. P	1		Only at the local scale	1			The project is not seeking recognition for exceptional climate change adaptation benefits.	1		1		1		1		1		1		1		1	1		No public comments were received through the CCBA Public Comment process which was active from 14 November – 14 December 2014. The audit team interviewed a great variety and number of stakeholders whose input is included throughout this report.
1392	Cajambre REDD+ Project	Consejo Comunitario de Cajambre	Agriculture Forestry and Other Land Use	REDD	VM0006	Registered	Colombia	297488	Latin America		2020-06-04	14/11/2013	13/11/2043	1				1						Mentioned, but how this will be achieved is not described	1		1		1		1		1		1		1		1	1		None provided
999	Protection of the Amazon Rain Forest II	Redd Services	Agriculture Forestry and Other Land Use	REDD	VM0007	Under validation	Bolivia	54370	Latin America			2012-01-08	31/07/2042	1							1										1						1		1	1	Perhaps one of the most unpleasant aspects of sector 14 methodologies is that they reduce and or remove emissions at the price of also reducing development and employment opportunities. This was confirmed with interviews with surrounding communities who complained that AFOLU type projects are good for the environment but that the price paid (such as employment and economic development) for saving…
1389	Acapa -Â­ Bajo Mira Y Frontera REDD+ Project	Multiple Proponents	Agriculture Forestry and Other Land Use	REDD	VM0006	Registered	Colombia	404786	Latin America		2020-09-06	13/11/2013	2043-12-11	1										"The project is not seeking Gold Level validation or verification for climate change adaption benefits at this time."			1		1		1				1		1		1	1		None provided
3911	NEC AND SAKYU IFM -THE 1ST PILOT FOR FSC FOREST IN JAPAN-	Multiple Proponents	Agriculture Forestry and Other Land Use	IFM	VM0010	Rejected by Administrator	Japan	249	Asia			2019-01-09	31/08/2039
1112	The Russas Project	Multiple Proponents	Agriculture Forestry and Other Land Use	REDD	VM0007	Registered	Brazil	120147	Latin America		2020-04-06	17/03/2011	16/03/2041	1							1				1		1		1		1				1				1	1
2330	Protection of mangroves and community developmental activities in the biodiversity hotspot of Colombia	WeAct Pty Ltd.	Agriculture Forestry and Other Land Use	REDD	VM0015	Under validation	Colombia	460000	Latin America	Investor is Australian		2016-01-04	31/03/2046	1																	1		1		1		1		1	1
4080	Inner Mongolia Kuduer Improved Forest Management Project	Kuduer Forest Industry Co., LTD	Agriculture Forestry and Other Land Use	IFM	VM0010	Rejected by Administrator	China	109790	Asia			2020-01-01	31/12/2049
2392	REDD + in the Forests of the OtÃºn River Basin	Empresa de Acueducto y Alcantarillado de Pereira S.A.S E.S. P	Agriculture Forestry and Other Land Use	REDD	VM0015	Registration and verification approval requested	Colombia	30874	Latin America			2016-01-01	31/12/2045	1							1		1								1		1				1		1	1
1027	IWC BRAZILIAN AMAZON GROUPED REDD APD, AUPD AND BIOMASS TO FUEL PROJECTS	International Wood Corporation	Agriculture Forestry and Other Land Use; Energy industries (renewable/non-renewable sources)	REDD	VM0005; VM0015; Methodology Under Development	Under development	Brazil	500000	Latin America			2021-01-12	30/11/2031	1																		Mentioned but no details about how					1		1	1
672	INFAPRO Rehabilitation of logged-over dipterocarp forest in Sabah, Malaysia	Face the Future	Agriculture Forestry and Other Land Use	IFM	VM0005	Registered	Malaysia	138013	Oceania		2020-06-04	2017-01-01	31/12/2026	1																							1		1	1
2586	413 REDD Project	413 Environmental, LLC	Agriculture Forestry and Other Land Use	REDD	VM0007	Under validation	Brazil	1465769	Latin America			2021-01-01	31/12/2050	1		1	REDD Methodological Module, “Methods for monitoring of greenhouse gas emissions and removals (MMON)								1		1				1				1		1		1	1
2609	KUAMUT RAINFOREST CONSERVATION PROJECT	Permian Malaysia SDN. BHD	Agriculture Forestry and Other Land Use	IFM	VM0010	Registered	Malaysia	16291489	Asia		13/04/2023	2015-11-12	2045-10-12	1							1		1				1				1		1		1		1		1	1	No comments were received during the commenting period, as evident from the VCS pipeline in the web interface
1202	LOWER ZAMBEZI REDD+ PROJECT	BioCarbon Partners	Agriculture Forestry and Other Land Use	REDD	VM0009	Registered	Zambia	210316	Africa		2020-06-04	2009-01-10	30/09/2039	1											1						1						1		1	1	All positive
812	Bull Run Overseas Forest Carbon Project	Bull Run Overseas Ltd.	Agriculture Forestry and Other Land Use	REDD	VM0007	Registered	Belize	12315	Latin America	Investor is Ugandan	2020-06-04	2009-01-01	31/12/2038	1											1						1		1				1		1	1	Quite a few negative comments, especially around leakage, and benefits to local people
2320	National REDD+ Project in the Democratic Republic of Congo	Kanaka Management Services Pvt. Ltd	Agriculture Forestry and Other Land Use	REDD	VM0015	Rejected by Administrator	Congo, The Democratic Republic of The	1000000000	Africa			27/06/2017	26/06/2117	1						Additionality section doesn't really get leakage					1		1		1		1								1	1
4165	Seringueira REDD+ Project	Multiple Proponents	Agriculture Forestry and Other Land Use	REDD	VM0007	Under validation	Brazil	1054735	Latin America			17/07/2020	16/07/2030	1									1		1		1				1				1		1		1	1
2363	CONSERVATION OF MIOMBOS IN TARU KENYA REDD+	Swiss carbon Value Ltd.	Agriculture Forestry and Other Land Use	REDD	VM0009	Under validation	Kenya	16225	Africa	Investor from Zurich, Switzerland		2016-01-07	30/06/2046	1											1		1				1		1		1		1		1	1
3306	Buritirana Grouped REDD+ Project	Future Carbon Consultoria e Projetos Florestais LTDA	Agriculture Forestry and Other Land Use	REDD	VM0015	Under development	Brazil	5149	Latin America			2020-03-09	2030-02-09	1							1		1								1		1				1		1	1
985	Cordillera Azul National Park REDD Project	CIMA, Cordillera Azul	Agriculture Forestry and Other Land Use	REDD	VM0007	Registered	Peru	1575268	Latin America		2020-06-04	2008-08-08	2028-07-08	1											1						1						1		1	1
3284	INTEGRATED REDD+ PROJECT1 IN PAPUA NEW GUINEA	Kanaka Management Services Private Limited	Agriculture Forestry and Other Land Use	REDD	VM0015	Under development	Papua New Guinea	20012952	Oceania			2017-01-11	31/10/2117	1			Only with regards to legal complance								1		1				1		1				1		1	1	Approximate 92% overstated carbon credits. Project developer should estimate the credits conservatively. Any over estimated credits gives bad impression amongst other standards and have negative opinions.
4141	Itamarati Grouped REDD Project	Future Carbon Holding S.A.	Agriculture Forestry and Other Land Use	REDD	VM0015	Under validation	Brazil	42151	Latin America			25/04/2022	24/04/2052	1							1				1						1		1				1		1	1	Comments mainly about the project description not being detailed enough
3606	Jiangxi Ruijin Improved Forest Management Project	Jiangxi Tianye Biotechnology Limited	Agriculture Forestry and Other Land Use	IFM	VM0010	Registration requested	China	115702	Asia			2020-01-01	31/12/2049	1							1																1		1	1
1477	Katingan Peatland Restoration and Conservation Project	PT. Rimba Makmur Utama (PT. RMU)	Agriculture Forestry and Other Land Use	ARR; REDD; WRC	VM0007	Registered	Indonesia	7451846	Asia		2020-06-04	2010-01-11	31/10/2070	1											1								1				1		1	1
1695	Scheme of Compensation for Ecosystem Services for Forest Management and Conservation of Water Sources in the Jurisdiction of CORPOCHIVOR	Local Environmental Authority of Chivor (CORPOCHIVOR)	Agriculture Forestry and Other Land Use	REDD	VM0015	Registered	Colombia	1662	Latin America		16/01/2018	2014-11-04	2044-10-04	1											1						1		1				1		1	1
3457	Fujian Guangze IFM (conversion of logged to protected forest) Project	Multiple Proponents	Agriculture Forestry and Other Land Use	IFM	VM0010	Under validation	China	117254	Asia			2020-01-02	31/01/2050	1												Not very clear how stakeholders have been included in the process, it just says that they have been						Not clear how biodiversity will be considered					1		1	1
2765	IMPROVED FOREST MANAGEMENT THROUGH LOGGED-TO-PROTECTED FORESTS AND REDUCED IMPACT LOGGING IN UFA NGOMBÃ‰, REPUBLIC OF CONGO	Interholco AG	Agriculture Forestry and Other Land Use	IFM	VM0010	Under development	Congo	413560	Africa			2015-01-01	31/12/2024	1							1										1						1		1	1
2483	PNG Communities BEST REDD - Tavolo Project	FORCERT Limited	Agriculture Forestry and Other Land Use	REDD	VM0007	Under development	Papua New Guinea	202142	Oceania			23/01/2019	22/01/2029	1																	1				1		1		1	1
1325	Mjumita Community Forest Project (Lindi)	Multiple Proponents	Agriculture Forestry and Other Land Use	REDD	VM0015	Registered	Tanzania	46263	Africa		21/12/2015	21/04/2012	20/04/2042	1																			1				1		1	1
3074	Guangxi Tianyang IFM (conversion of logged to protected forest) Project	Guangxi Tianyang Nali Investment & Development Co., Ltd	Agriculture Forestry and Other Land Use	IFM	VM0010	Registration requested	China	88226	Asia			2018-01-01	31/12/2037	1											1						1						1		1	1
4076	Miramichi Timber Forest Carbon Project	Miramichi Timberlands Ltd	Agriculture Forestry and Other Land Use	IFM	VM0034	Under validation	Canada	21268	North America			27/07/2021	26/07/2051	1									1		NA						1		1				1		1	1
904	Reduced Emissions from Deforestation and Degradation in Community Forests â€“ Oddar Meanchey, Cambodia	Royal Government of Cambodia-Forestry Admin	Agriculture Forestry and Other Land Use	REDD	VM0006	Registered	Cambodia	204792	Asia		2020-06-04	28/02/2008	27/02/2038	1				1							1						1						1		1	1
1686	Agrocortex REDD Project	Agrocortex Madeiras do Acre Agroflorestal Ltda.	Agriculture Forestry and Other Land Use	REDD	VM0015	Registered	Brazil	483594	Latin America		2018-11-04	2014-01-07	30/06/2044	1							1				1						1						1		1	1
1455	Reduction of the deforestation and degradation of tropical dry forests in Piura and Lambayeque	Multiple Proponents	Agriculture Forestry and Other Land Use	REDD	VM0015	Registration requested	Peru	46803	Latin America			2013-01-04	31/03/2033	1											1						1		1		1		1		1	1
1382	The Envira Amazonia Project - A Tropical Forest Conservation Project in Acre, Brazil	Multiple Proponents	Agriculture Forestry and Other Land Use	REDD	VM0007	Registered	Brazil	1259646	Latin America		2020-06-04	2012-02-08	2042-01-08	1		1	This monitoring plan has been developed in close conjunction with module VMD0015 of the REDD Methodological Module, “Methods for monitoring of greenhouse gas emissions and removals (M-MON)				1										1		1				1		1	1
4034	Agropalma REDD+ Project	Multiple Proponents	Agriculture Forestry and Other Land Use	REDD	VM0015	Under validation	Brazil	671744	Latin America			2021-04-08	2051-03-08	1	1						1				1						1		1		1		1		1	1	Comments are mixed, but the company is a palm oil producer which seems to have raised concerns
2621	YUNNAN DAYAO IFM (CONVERSION OF LOGGED TO PROTECTED FOREST) PROJECT	Multiple Proponents	Agriculture Forestry and Other Land Use	IFM	VM0010	Under development	China	53799	Asia			2017-01-06	31/05/2037	1												Stakeholders were asked their opinion but not included in the process					1						1		1	1
2177	failed	MER	Agriculture Forestry and Other Land Use		VM0007	Withdrawn	Madagascar	1267231	Africa		13/02/2014
1168	Kulera Landscape REDD+ Program for Co-Managed Protected Areas, Malawi	Multiple Proponents	Agriculture Forestry and Other Land Use	REDD	VM0006	Registered	Malawi	210421	Africa		2020-06-04	2009-01-10	30/09/2039	1											1						1						1		1	1
2709	Juruena River REDD+ Project	EcolÃ³gica Assessoria Ltda.	Agriculture Forestry and Other Land Use	REDD	VM0015	Registration and verification approval requested	Brazil	100588	Latin America			2020-12-11	2050-11-11	1							1										1						1		1	1
3879	Guangdong Huaiji IFM (conversion of logged to protected forest) Project	Huaiji County Weizhou Construction Investment and Development Group Co., Ltd	Agriculture Forestry and Other Land Use	IFM	VM0010	Rejected by Administrator	China	106187	Asia			2018-01-11	31/10/2038
3152	Alto Xingu Grouped REDD+ Project	EcolÃ³gica Assessoria Ltda.	Agriculture Forestry and Other Land Use	REDD	VM0015	Under development	Brazil	57902	Latin America			19/07/2021	18/07/2051	1																	1						1		1	1
3506	REDD Project - Territorio IndÃ­gena Originario Campesino	Green Carbon Partners Pty Limited	Agriculture Forestry and Other Land Use	REDD	VM0015	On Hold	Bolivia	16028913	Latin America			2018-01-01	31/12/2047	1											1		1		1		1						1		1	1
3335	Developing a voluntary carbon market project for Pench Tiger Reserve in India	Tiger Conservation Foundation of Pench Tiger Reserve (TCFP)	Agriculture Forestry and Other Land Use	ARR; REDD	VM0037	Under development	India	56845	Asia			2017-01-10	30/09/2047	1											1						1		1		1		1		1	1
3380	SIMFlor Programme 1	SIMFlor Ltd	Agriculture Forestry and Other Land Use	REDD	VM0007	Under development	Brazil	1000000	Latin America			2022-01-08	31/07/2052	1																		Only mentioned with regards to compliance and SDGs		Only mentioned with regards to compliance and SDGs	1	Water	1		1	1
4069	MamuriÃ¡ Grouped REDD Project	Future Carbon Holding S.A.	Agriculture Forestry and Other Land Use	REDD	VM0007; VM0015	Under validation	Brazil	297630	Latin America			2020-07-10	2050-06-10	1	1			1							1						1						1		1	1
4079	Lamaja Forest Carbon Project	Lamaja Forestry Holding Ltd	Agriculture Forestry and Other Land Use	IFM	VM0034	Under validation	Canada	17243	North America			21/08/2021	20/08/2051	1									1		1						1		1		1		1		1	1
3226	Padang Tikar Landscape	Multiple Proponents	Agriculture Forestry and Other Land Use	REDD; WRC	VM0007	Under validation	Indonesia	590557	Asia			30/08/2017	29/08/2047	1		1					1				1						1		1		1		1		1	1
2661	Jilin Longjing IFM (conversion of logged to protected forest) Project	Longjing State owned Sanhe Forest Farm	Agriculture Forestry and Other Land Use	IFM	VM0010	Registration requested	China	20952	Asia			2017-09-04	2037-08-04	1		1										There was a questionaire, but weren't engaged in the process											1		1	1
872	Afognak Forest Carbon Project	ClimeCo LLC	Agriculture Forestry and Other Land Use	IFM	VM0012	Registered	United States	40451	North America		2020-06-04	2006-01-01	31/12/2035	1							1				1						1		1		1		1		1	1
2638	Hubei Xingshan IFM (conversion of logged to protected forest) Project	Xingshan County Economic Development Investment Co., Ltd.	Agriculture Forestry and Other Land Use	IFM	VM0010	Registration requested	China	53557	Asia			2017-09-03	2037-08-03	1		1										There was a questionaire, but weren't engaged in the process					1						1		1	1
934	The Mai Ndombe REDD+ Project	Wildlife Works Carbon LLC	Agriculture Forestry and Other Land Use	REDD	VM0009	Registered	Congo, The Democratic Republic of The	5671613	Africa		2020-06-04	14/03/2011	13/03/2041	1		1									1						1		1				1		1	1	There is too much forest loss in recent years within the project area as per the Global Forest Watch. Teams should carefully review this aspect.
4016	Amazon Biome Conservancy Grouped REDD+ Project	Systemica (MYS E JLFL TREINAMENTO GERENCIAL LTDA)	Agriculture Forestry and Other Land Use	REDD	VM0007	Under validation	Brazil	97926	Latin America			19/11/2022	18/11/2052	1		1	VM0007 REDD+ Methodology Framework (APDD) v1.6				1				1						1				1		1		1	1
3734	BOSQUES CAUTIN S.A. FOREST CARBON PROJECT CONVERSION OF LOGGED TO PROTECTED FOREST PROJECT	Bosques Cautin S.A.	Agriculture Forestry and Other Land Use	IFM	VM0010	Under validation	Chile	124951	Latin America			26/03/2021	25/03/2054	1																	1		1				1		1	1
3365	Developing Voluntary Carbon market project for Sundarban Tiger Reserve in India	Value Network Ventures Advisory Services Pvt. Ltd.	Agriculture Forestry and Other Land Use	ARR; WRC	VM0007	Under development	India	57587	Asia			2018-01-10	30/09/2048	1											1						1		1				1		1	1
4089	Rio Branco Grouped REDD Project	Future Carbon Holding S.A.	Agriculture Forestry and Other Land Use	REDD	VM0007; VM0015	Under validation	Brazil	17021	Latin America			13/10/2020	2050-12-10	1	1						1		1		1		1				1		1		1		1		1	1
1162	Jiangxi Province Le'an County Forest Farm Carbon Sink Project	Beijing Shengdahuitang Carbon Management Co.,Ltd.	Agriculture Forestry and Other Land Use	REDD	VM0010	Registered	China	86680	Asia		2020-06-04	2006-01-01	31/12/2035	1																							1		1	1
4095	Rio Manito Grouped REDD Project	Future Carbon Holding S.A.	Agriculture Forestry and Other Land Use	REDD	VM0015	Under validation	Brazil	102785	Latin America			2022-01-12	30/11/2052	1	1						1		1		1		1				1		1		1		1		1	1
3141	Western Amazon REDD+ Grouped Project	CARBON CREDITS CONSULTING S.R.L.	Agriculture Forestry and Other Land Use	REDD	VM0015	Under validation	Brazil	362077	Latin America			2019-01-01	31/12/2048	1							1				1						1		1		1		1		1	1
1916	Quebec Forestry Sector Carbon Sequestration Grouped Project Pivot	Multiple Proponents	Agriculture Forestry and Other Land Use	ARR; IFM	VM0034	Registered	Canada	115408	North America		26/04/2021	2018-01-01	31/12/2097	1							1				1						1		1				1		1	1
1650	Reduced Emissions from Deforestation and Degradation in Keo Seima Wildlife Sanctuary	Royal Government of Cambodia (RGC), Ministry of Environment	Agriculture Forestry and Other Land Use	REDD	VM0015	Registered	Cambodia	1426648	Asia		2020-06-04	2010-01-01	31/12/2069	1							1		1		1				1		1						1		1	1
2502	TAHUAMANU AMAZON REDD PROJECT	MADERERA RIO ACRE SAC	Agriculture Forestry and Other Land Use	REDD	VM0006	Registered	Peru	1575108	Latin America		14/11/2022	19/04/2017	18/04/2047	1							1				1						1		1		1		1		1	1
3575	Kokolopori Bonobo Peace Forest Grouped REDD Project	Multiple Proponents	Agriculture Forestry and Other Land Use	REDD	VM0015	Under development	Congo, The Democratic Republic of The	1047213	Africa			26/02/2021	25/02/2031	1																	1		1				1		1	1	The communities were consulted regarding the formation of Bonobo de Kokolopori Nature Reserve in 2008. Are communities happy in the present scenario? The problem with tree cover loss analysis using GFW is they dont have ground truth data.
1821	ConservaciÃ³n de los Ecosistemas y el AlmacÃ©n de Carbono RegiÃ³n de TransiciÃ³n Guayano AmazÃ³nica 'Flor de InÃ­rida'	Ciprogress Greenlife	Agriculture Forestry and Other Land Use	REDD	VM0007	On Hold	Colombia	7627523	Latin America			2017-01-01	31/12/2116	1											1						1		1		1		1		1	1
3452	Sichuan Huili Improved Forest Management Project	Multiple Proponents	Agriculture Forestry and Other Land Use	IFM	VM0010	Registration requested	China	126366	Asia			2019-01-12	30/11/2039	1							1				1						1						1		1	1
1218	Evio KuiÃ±aji EseÂ´Eja Cuana, To Mitigate Climate Change, Madre de Dios - PerÃº	Multiple Proponents	Agriculture Forestry and Other Land Use	REDD	VM0007	Registered	Peru	114410	Latin America		29/04/2020	2011-01-07	30/06/2031	1									1								1				1				1	1
2698	Liaoning Kangping IFM (conversion of logged to protected forest) Project	Kangping County Liaobei Seedling Development Co., Ltd.	Agriculture Forestry and Other Land Use	IFM	VM0010	Registration requested	China	27672	Asia			2018-01-01	31/12/2037	1											1						1				1		1		1	1
1848	Korea - Myanmar Joint - Bago District REDD+ Program, with North Zamari Wildlife Sanctuary	Multiple Proponents	Agriculture Forestry and Other Land Use	REDD	VM0006	Under validation	Myanmar	238397	Asia			2016-03-06	2046-02-06	1		1		1					1		1						1				1		1		1	1
1715	Inner Mongolia Wuâ€˜erqihan IFM (conversion of logged to protected forest) Project	Multiple Proponents	Agriculture Forestry and Other Land Use	IFM	VM0010	Registered	China	293347	Asia		2020-06-04	2013-01-01	31/12/2042	1											1												1		1	1	The survey shows that all of the stakeholders and the residents of the areas supported the conversion activity from logged to protected forest. In conclusion, the survey indicates that the Project has few negative impacts on local environment
2760	REDD+ Project in Oro Province of Papua New Guinea	Kanaka Management Services Private Limited	Agriculture Forestry and Other Land Use	REDD	VM0015	Registration and verification approval requested	Papua New Guinea	8099752	Oceania			2017-06-05	2117-05-05	1		1											1				1								1	1	Comments are negative - especially due to a lack of involvement of local people
3726	Amazon Guardians REDD+ Project	Bosques AmazÃ³nicos	Agriculture Forestry and Other Land Use	REDD	VM0006	Under validation	Peru	504125	Latin America			2021-01-01	31/12/2030	1											1				1		1		1		1		1		1	1
2539	EVERGREEN REDD+ PROJECT	Multiple Proponents	Agriculture Forestry and Other Land Use	REDD	VM0007	Registered	Brazil	1566547	Latin America		14/04/2022	25/11/2020	24/11/2050	1		1															1						1		1	1
4299	COMACO Landscape Management Project-South	Community Markets for Conservation (COMACO)	Agriculture Forestry and Other Land Use	ALM; REDD	VM0015; VM0017	Rejected by Administrator	Zambia	224504	Africa			2020-01-07	30/06/2030
2345	Green Gold Loreto 1	Green Gold Forestry Peru SA	Agriculture Forestry and Other Land Use	IFM	VM0010	Registered	Peru	486931	Latin America		2022-07-01	2020-01-08	31/07/2040	1											1						1				1		1		1	1
3344	The Last Habitat REDD+ project	Bosques Amazonicos	Agriculture Forestry and Other Land Use	REDD	VM0007	Under development	Peru	781865	Africa			2020-01-03	29/02/2040	1											1				1		1		1		1		1		1	1
2290	BLUE CARBON PROJECT GULF OF MORROSQUILLO â€œVIDA MANGLARâ€	Conservation International Foundation	Agriculture Forestry and Other Land Use	REDD	VM0007	Registered	Colombia	31310	Latin America		2021-06-05	15/05/2015	14/05/2045	1															1		1		1		1		1		1	1
2071	COCOMACIA COMMUNITY REDD+ PROGRAM, CHOCO/ANTIOQUIA COLOMBIA	Multiple Proponents	Agriculture Forestry and Other Land Use	REDD	VM0006	Under development	Colombia	3073861	Africa			31/08/2016	30/08/2046	1																			1				1		1	1
605	Protection of a Tasmanian native forest - Project 1 - REDD Forests Pilot	Multiple Proponents	Agriculture Forestry and Other Land Use	REDD	VM0010	Registered	Australia	4956	Oceania		2020-06-04	13/03/2009	2034-12-03	1							1										1						1		1	1
														95	6.31579	15.7895		12.6316	4.21053	0	31.5789		16.8421		56.8421		14.7368		14.7368		81.0526		50.5263		38.9474		89.4737		97.8947	100
